# Supplementary material for: Long-range epigenetic silencing at 2q14.2 affects most human colorectal cancers and may have application as a non-invasive biomarker of disease
Source: PubMed Central journal article supplement (PMC2696749; doi:10.1038/sj.bjc.6605045), 2009-04-21
Supplement: 6605045x1.pdf [file 6605045x1.pdf]

**Long range epigenetic silencing in 2q14.2 affects most human colorectal cancers and may have application as a non-invasive biomarker of disease**

Regina Mayor, Laura Casadomé, Daniel Azuara, Victor Moreno, Susan J. Clark, Gabriel Capellà, Miguel A. Peinado

**Supplemental Information**

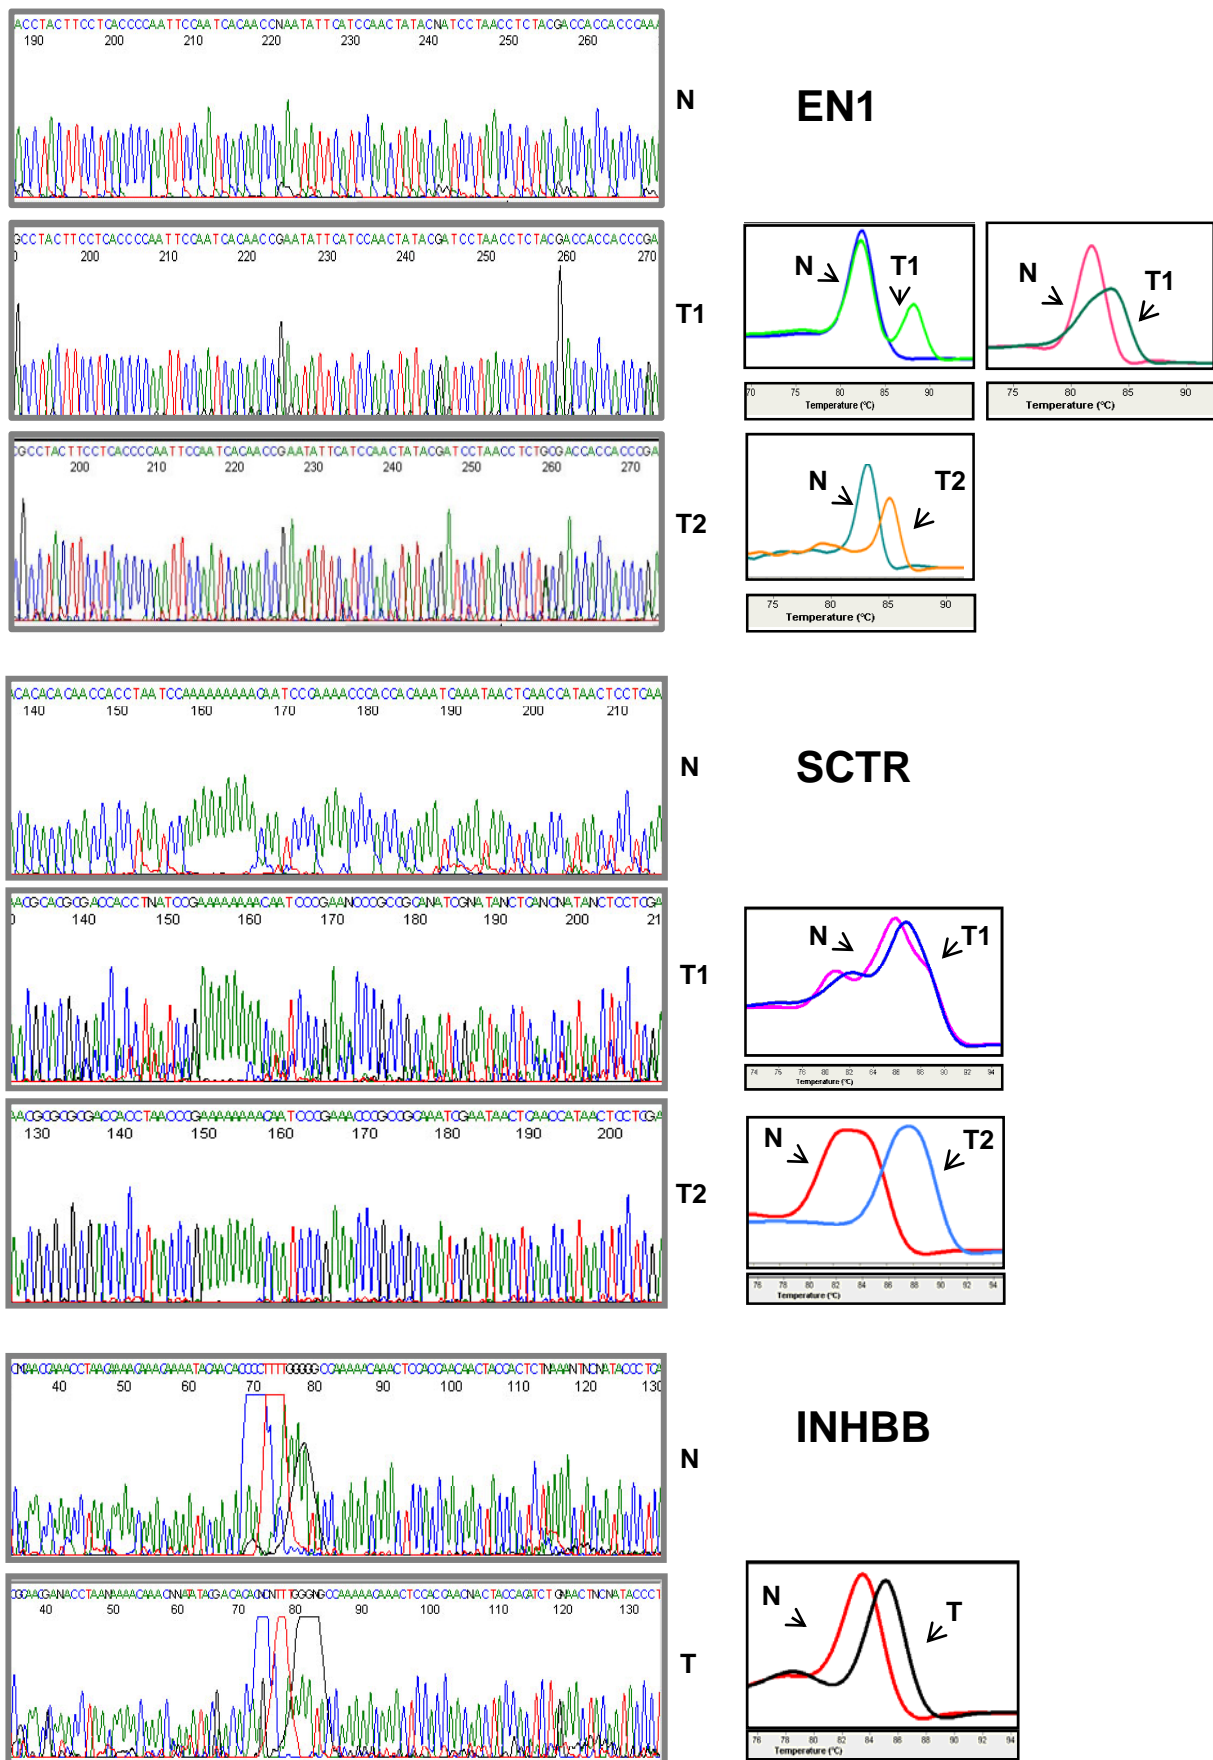

**Supplemental figure 1.** Methylation profile of EN1, SCTR and INHBB genes by direct bisulfite sequencing and Real-Time PCR dissociation analysis in paired normal (N) and colon carcinomas (T). Illustrative examples for fully methylated, partially methylated and unmethylated sample DNAs.

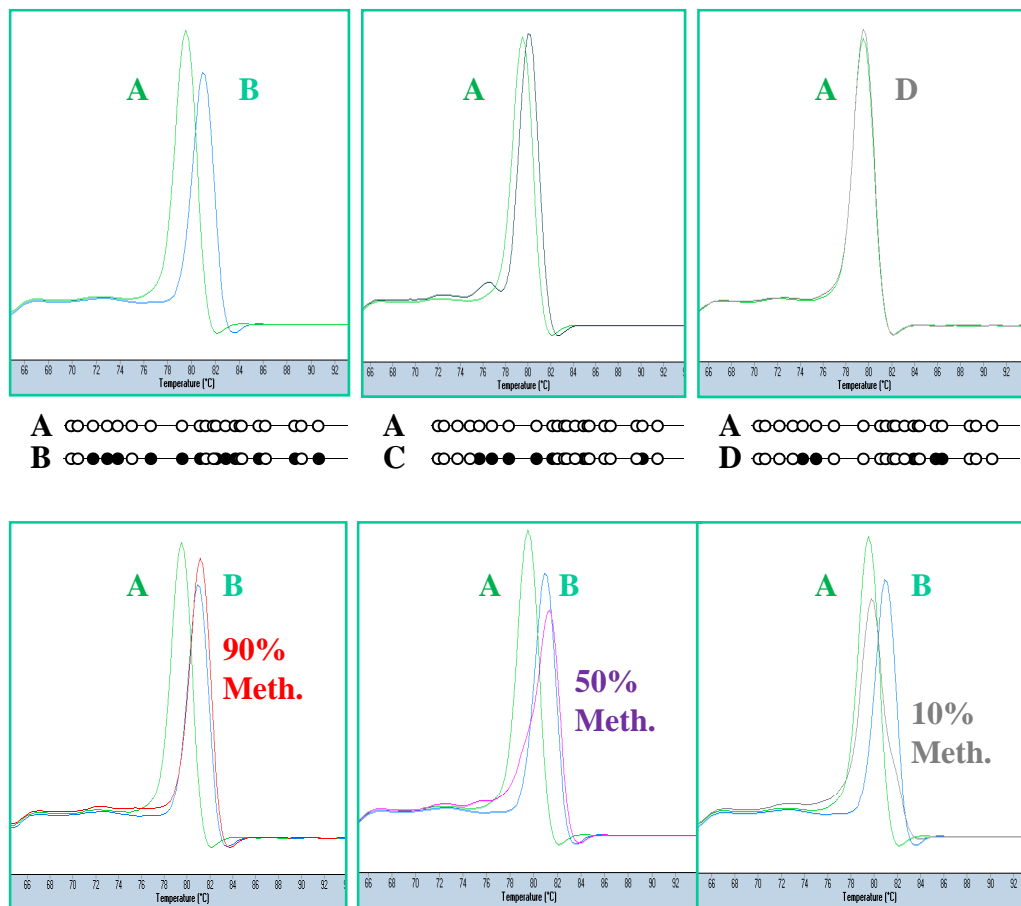

**Supplemental figure 2. Melting curve methylation analysis in pure clones and mixed clones of EN1 bisulphite PCR product.** Methylation profiles of four different clones (A, B, C, D) of EN1 are represented by melting curve and bisulphite sequencing analyses in the upper part. Empty dots represent unmethylated CpG sites; black dots represent methylated CpG sites as determined by DNA sequencing. Clone A: 0 methylated CpG sites; clone B: 12 methylated CpG sites; clone C: 7 methylated CpG sites; clone D: 5 methylated CpG sites. Methylation profiles of three different mixes (9:1, 1:1, 1:9) of the completely unmethylated clone A and the methylated clone B are represented together with the pure clones A and B. Dilution curves are shown as the percentage of methylated into unmethylated DNA.

**A**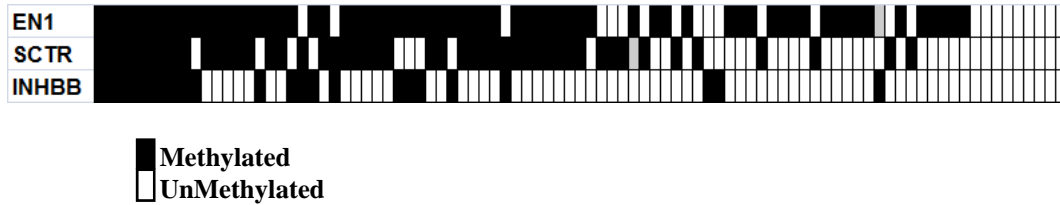**B**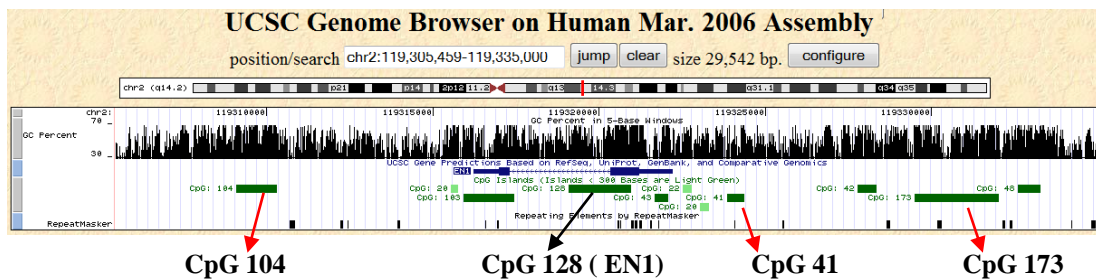**C**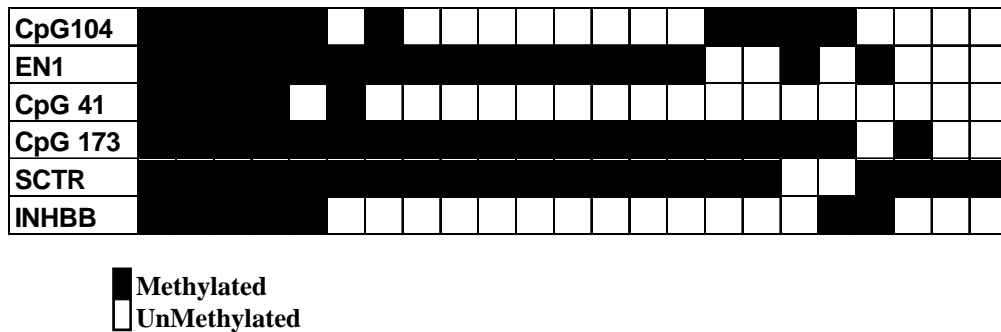

**Supplemental Figure 3.** Extent of methylation across 2q14.2 region. (A) DNA methylation in EN1, SCTR and INHBB CpG island promoters in a series of 91 colon carcinomas. (B) UCSC genome browser window illustrating the position of three additional CpG islands in regard to the EN1 gene. (C) DNA methylation in six CpG islands across 2q14.2 in a subgroup of 23 colorectal carcinomas.

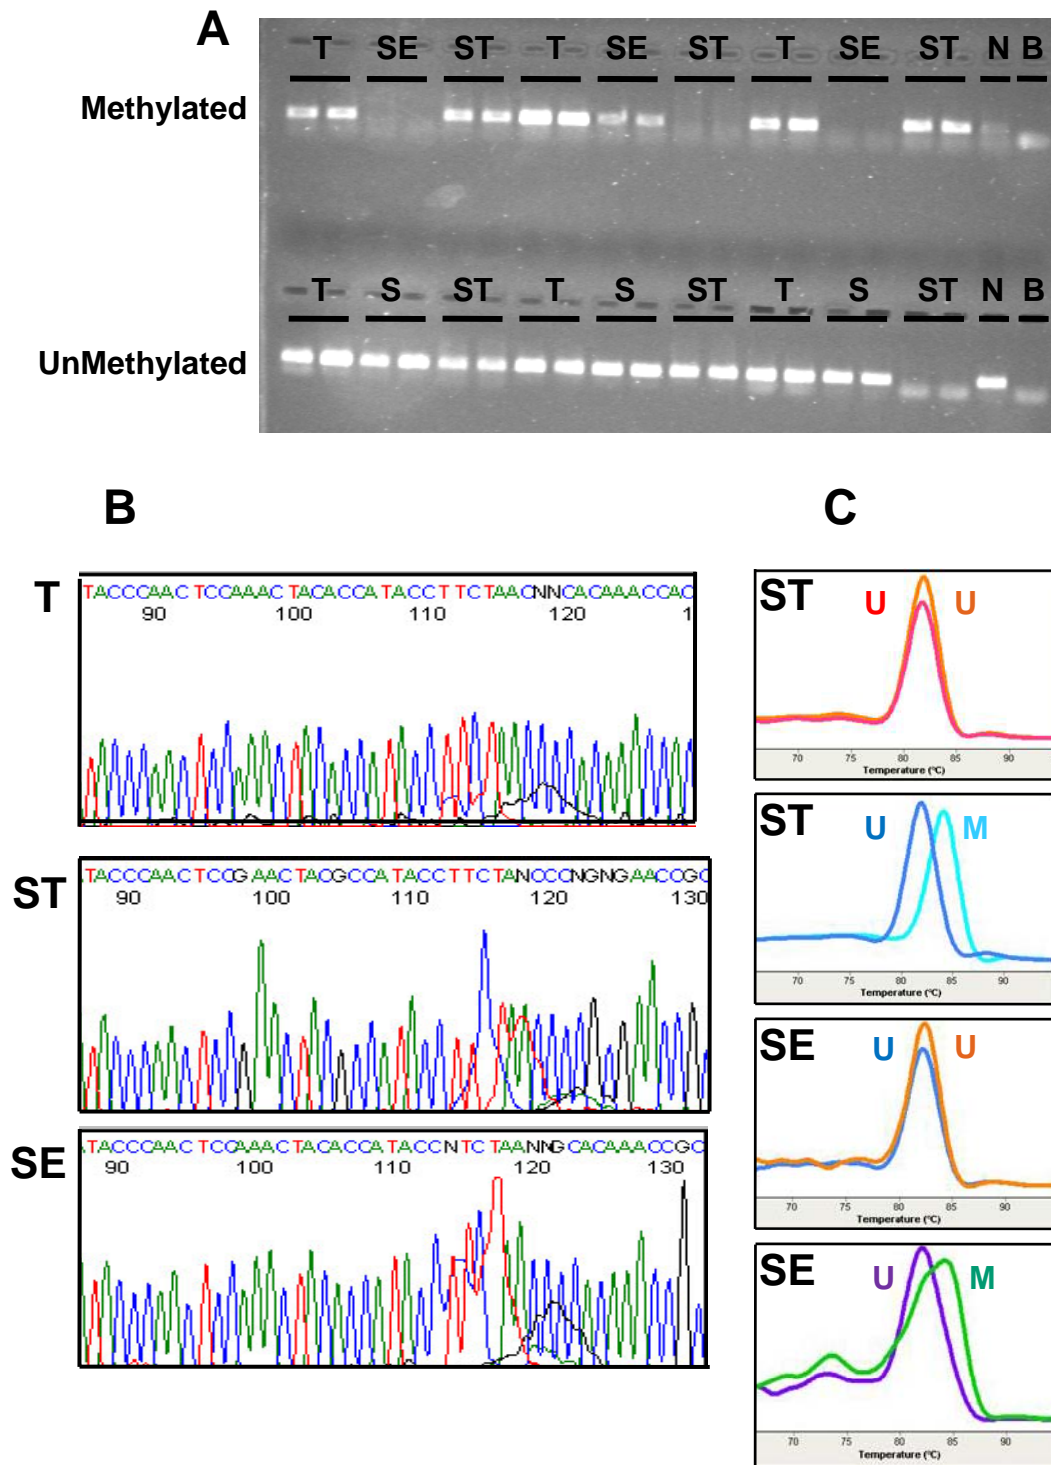

**Supplemental Figure 4.** Illustrative examples of DNA methylation analysis of the EN1 CpG island in tumor, stool (ST) and serum (SE) DNA using MSP (A), direct bisulfite sequencing (B) and melting curve analysis (C). Normal tissue DNA (N) and a blank (B) control were also included.

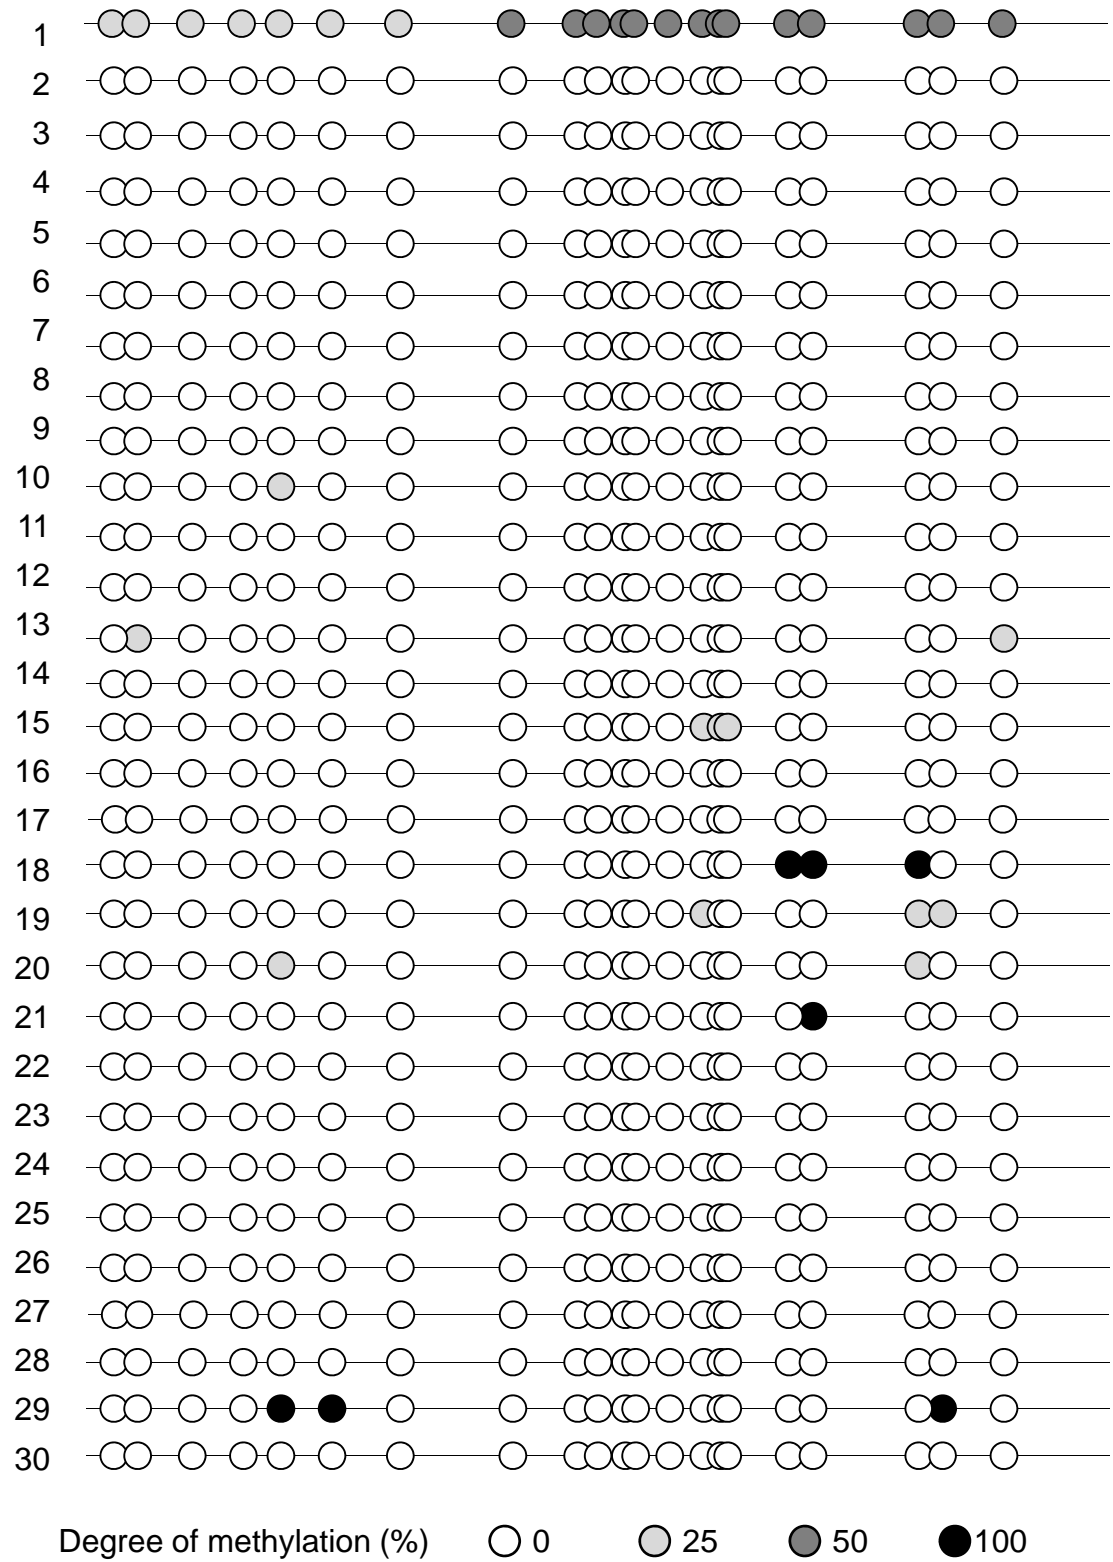

**Supplemental Figure 5.** Direct bisulfite sequencing data for EN1 CpG island promoter gene in the stools of 30 healthy individuals.

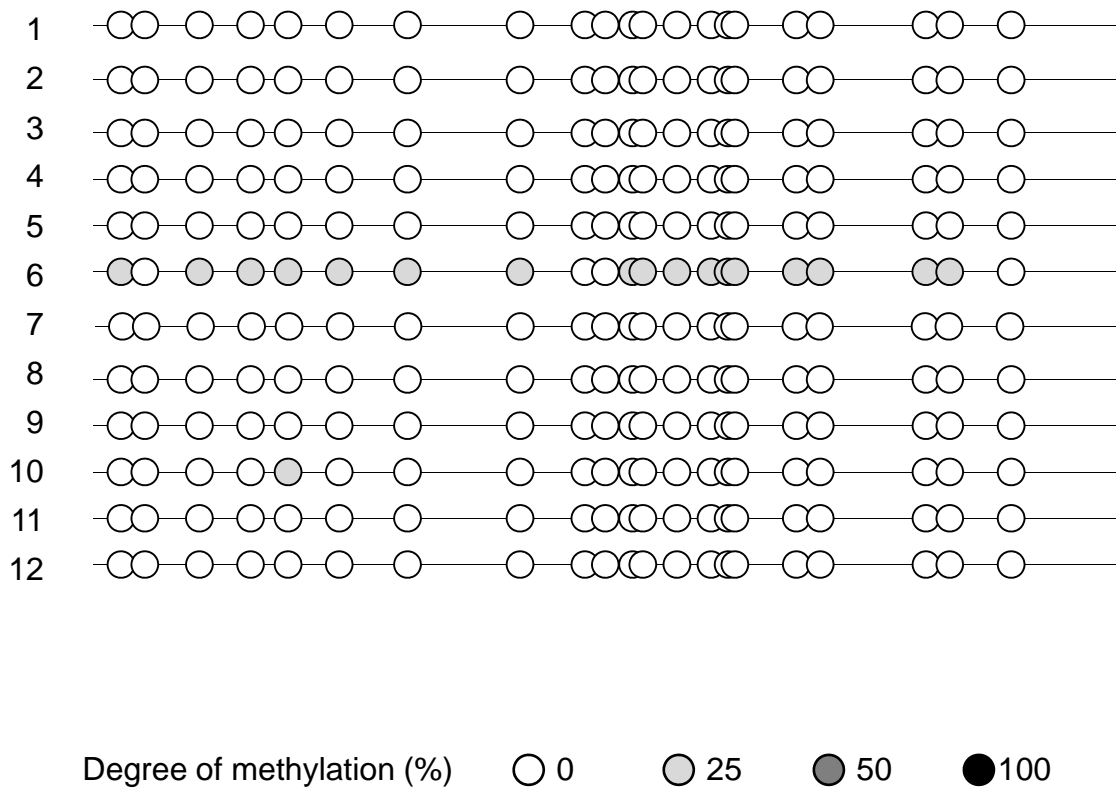

**Supplemental Figure 6.** Direct bisulfite sequencing data for EN1 CpG island promoter gene in the serum of 12 healthy individuals.

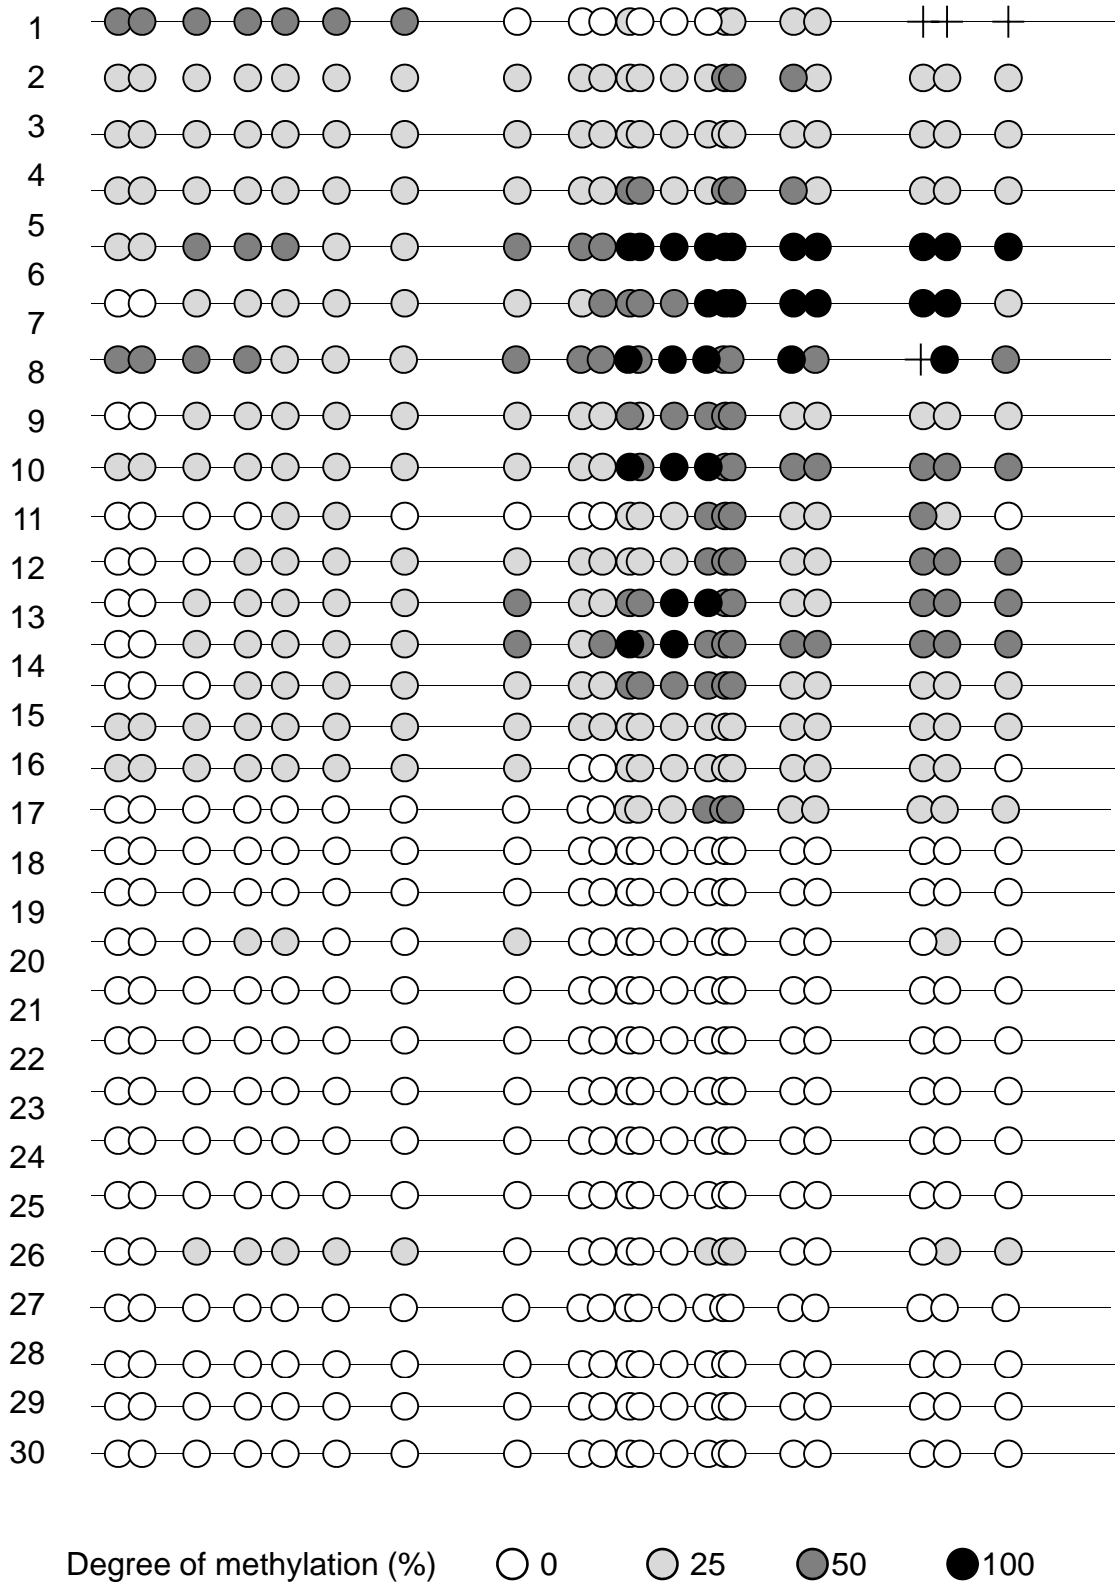

**Supplemental Figure 7.** Direct bisulfite sequencing data for EN1 CpG island promoter gene in the tumor of 30 colorectal cancer patients.





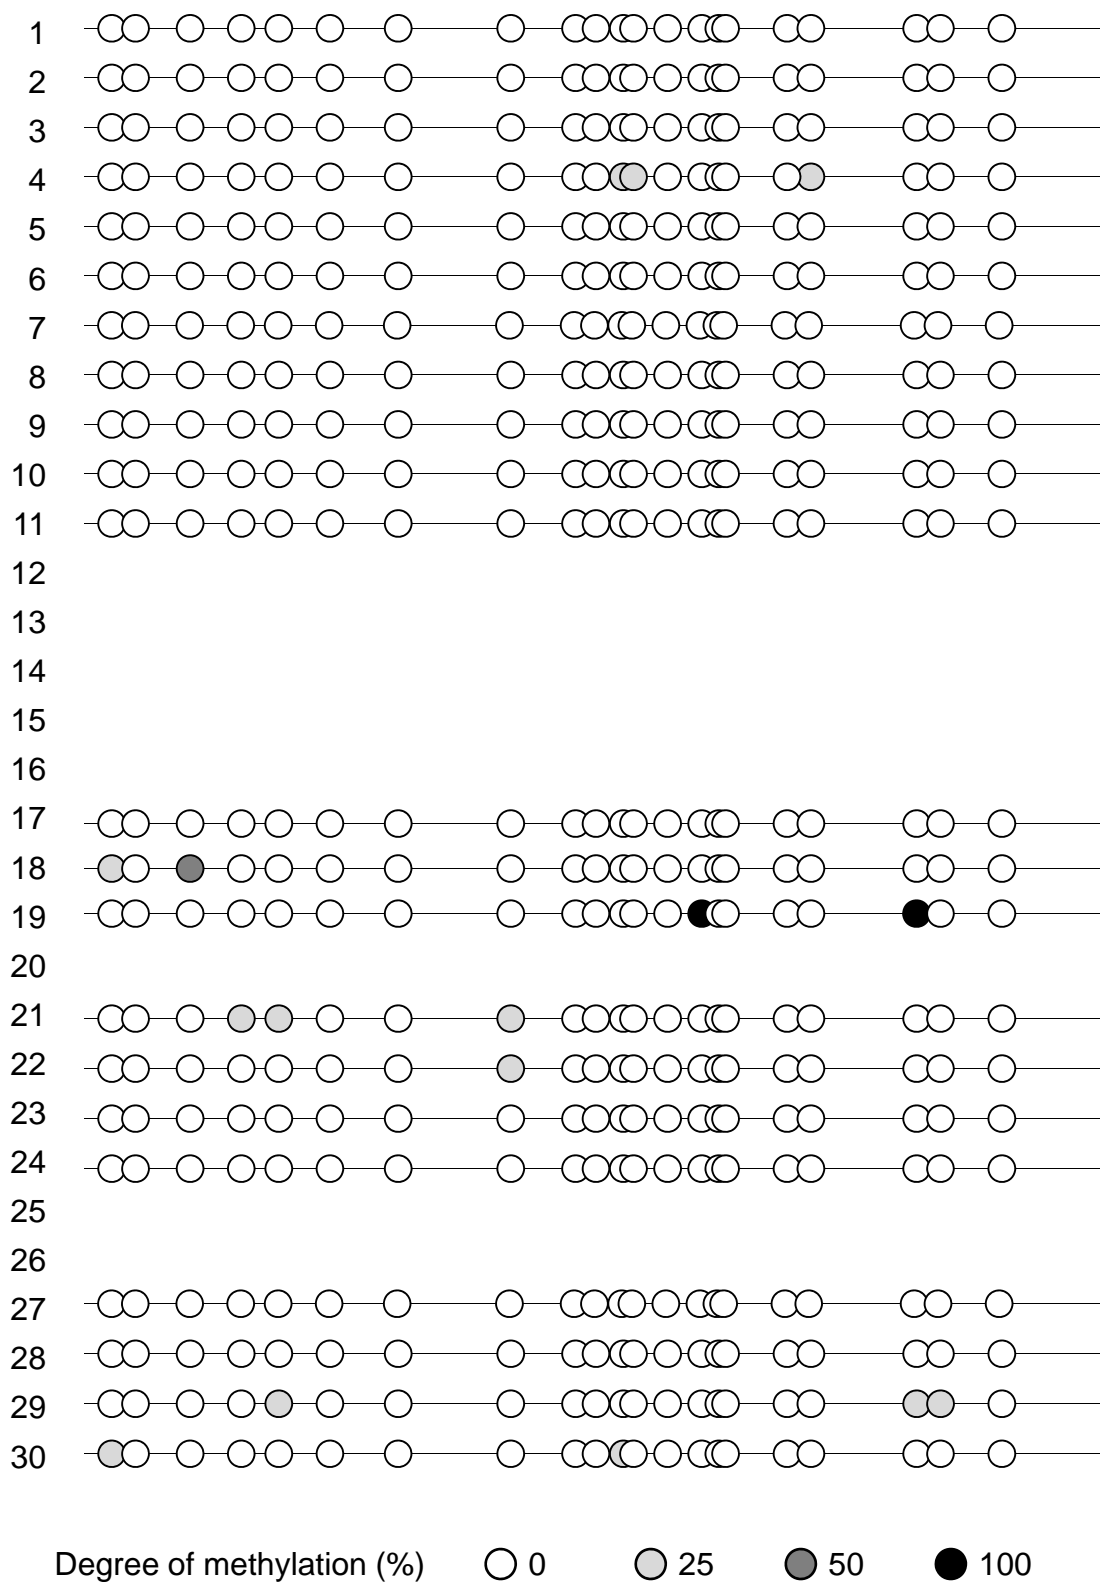

**Supplemental Figure 9.** Direct bisulfite sequencing data for EN1 CpG island promoter gene in the serum of 30 colorectal cancer patients.

**Supplemental Table 1. Distribution of DNA methylation according to clinicopathological features of colorectal cancers**

|                                         | n             | EN1 M/U (%M) | n            | SCTR M/U (%M) | n               | INHBB M/U (%M) | No of methylated genes 0/ 1/ 2/ 3 (%) |                         |
|-----------------------------------------|---------------|--------------|--------------|---------------|-----------------|----------------|---------------------------------------|-------------------------|
| <b>Categories</b>                       | 90            | 66/24 (73)   | 90           | 48/42 (53)    | 91              | 23/68 (25)     | 9/36/37/9 (10/40/41/10)               |                         |
| <b>Sex</b>                              | <b>Male</b>   | 50           | 42/13 (84)   | 56            | 31/25 (55)      | 56             | 10/ 46 (18)                           | 6/22/23/5 (12/44/46/10) |
|                                         | <b>Female</b> | 40           | 24/11 (60)   | 34            | 17/17 (50)      | 35             | 13/22 (37)                            | 3/14/14/4 (7/35/35/10)  |
|                                         |               |              | p= 0.468     |               | p= 0.667        |                | <b>p= 0.049</b>                       | p= 0.970                |
| <b>Dukes' stage</b>                     | <b>B</b>      | 42           | 36 / 7 (85)  | 43            | 28 / 15 (65)    | 43             | 14 / 29 (32)                          | 1/14/20/8 (2/33/47/19 ) |
|                                         | <b>C</b>      | 31           | 20/11 (64)   | 30            | 16/14 (53)      | 31             | 3/28 (9)                              | 4/16/10/1 (13/51/32/3 ) |
|                                         | <b>D</b>      | 16           | 10/6 (62)    | 17            | 4/13 (23)       | 17             | 6/11 (35)                             | 4/6/7/0 (25/37/43/0 )   |
|                                         |               |              | p= 0.102     |               | <b>p= 0.015</b> |                | <b>p= 0.047</b>                       | <b>p= 0.020</b>         |
| <b>Age (mean±SD)</b>                    | 90            | 65±12/68±11  | 90           | 66±11/67±14   | 91              | 66±13 /66±12   | 69±12/67±14 / 65±11/66±14             |                         |
|                                         |               |              | p= 0.463     |               | p= 0.684        |                | p= 0.984                              | p= 0.833                |
| <b>Localization</b>                     | <b>Right</b>  | 26           | 22 / 4 (84)  | 26            | 14 / 12 (54)    | 26             | 11 / 15 (42)                          | 1/8/12/5 (3/30/46/19)   |
|                                         | <b>Left</b>   | 64           | 44 / 20 (68) | 64            | 34 / 30 (53)    | 65             | 12 / 53 (18)                          | 8/28/25/4 (12/43/39/6 ) |
|                                         |               |              | p= 0.188     |               | p= 1.00         |                | <b>P= 0.031</b>                       | p= 0.136                |
| <b>p53 Mutation</b>                     | <b>Yes</b>    | 49           | 35 / 14 (71) | 50            | 30 / 20 (60)    | 50             | 17 / 33 (34)                          | 4/18/20/8 (8/36/40/16)  |
|                                         | <b>No</b>     | 29           | 22 / 7 (75)  | 28            | 13 / 15 (46)    | 29             | 5 / 24 (17)                           | 2/15/11/1 (7/51/38/3)   |
|                                         |               |              | p= 0.794     |               | p= 0.343        |                | p= 0.126                              | p= 0.299                |
| <b>K-ras Mutation</b>                   | <b>Yes</b>    | 31           | 26 / 5 (83)  | 30            | 16 / 14 (53)    | 31             | 9 / 22 (29)                           | 1/11/17/2 (3/35/55/6)   |
|                                         | <b>No</b>     | 59           | 40 / 19 (68) | 60            | 32 / 28 (53)    | 60             | 14 / 46 (23)                          | 8/25/20/7 (13/42/34/12) |
|                                         |               |              | P= 0.134     |               | p= 1.00         |                | p= 0.614                              | p= 0.158                |
| <b>Microsatellite Instability (MSI)</b> | <b>Yes</b>    | 7            | 5 / 2 (71)   | 8             | 3 / 5 (37)      | 8              | 3 / 5 (37)                            | 1/4/2/1(12/50/25/12)    |
|                                         | <b>No</b>     | 83           | 61 / 22 (73) | 82            | 45 / 37 (54)    | 83             | 20 / 63 (24)                          | 8/32/35/8 (10/38/42/10) |
|                                         |               |              | p= 1.00      |               | p= 0.465        |                | p= 0.412                              | p= 0.827                |

**Supplemental Table 2. Primer sequences for DNA methylation analysis.**

| <b>Purpose</b>                                                                  | <b>Primers sequence (5'- 3')</b>                 |
|---------------------------------------------------------------------------------|--------------------------------------------------|
| EN1 CpG island, bisulfite sequencing, melting curve analysis and MSP, first PCR | ACTATCCTACTTATAAACTC<br>AGAATAATAAAGATAAGAGAT    |
| EN1 CpG island, bisulfite sequencing and melting curve analysis, nested PCR     | CTACTTATAAACTCAACCAA<br>GTTTATAGGGATTTAGAGTTT    |
| SCTR CpG island, bisulfite sequencing and melting curve analysis, first PCR     | TCCAAAAACAATACTCTTTC<br>GTAGTAGTAGTTGTTGTAG      |
| SCTR CpG island, bisulfite sequencing and melting curve analysis, nested PCR    | CTAACCTCCTCCAACCTAAA<br>GTAGTAGTAGTTGTTGTAG      |
| INHBB CpG island, bisulfite sequencing and melting curve analysis, first PCR    | AAACCCTACCTCTATCCCAA<br>AAGTTTTGAGGTTTAGTGGTTTT  |
| INHBB CpG island, bisulfite sequencing and melting curve analysis, nested PCR   | CCTCCCCAACCAACAAAAA<br>GGTAGGTTTTTAGTGGTTATT     |
| Methylated EN1 CpG island, MSP nested PCR                                       | GTGGTCGTAGAGGTTAGGATC<br>CGCCATACCTTCTAACCCCGCG  |
| Unmethylated EN1 CpG island, MSP nested PCR                                     | GTGGTTGTAGAGGTTAGGATT<br>CACCATACCTTCTAACCCACACA |
| PTPN4 CpG island, bisulfite sequencing, first PCR                               | TTTGTAGGGAGGTAGGAGA<br>ACTTACCCACCTAACTCA        |
| PTPN4 CpG island, bisulfite sequencing, nested PCR                              | TTAGTAGTATGAGGTGGTGT<br>CCCAAAAACCACACATACAA     |
| RALB CpG island, bisulfite sequencing, first PCR                                | AGGATTTTTTGGGGGAGTTT<br>CTTCCCCTTAAAAACCCCTT     |
| RALB CpG island, bisulfite sequencing, nested PCR                               | TTTTTTGGGTTGTTTGGGGT<br>ACCAAAACAAAACCAACAAAC    |
| TSN CpG island, bisulfite sequencing, first PCR                                 | TTTTTTTTGTTTTTTTATGT<br>AAACAAATAATACTAAAAAA     |
| TSN CpG island, bisulfite sequencing, nested PCR                                | TTTATGTTTAGTTGGGTTAT<br>AAATCAAAACAAAACAACAAA    |

**Supplemental Table 3. Primer sequences for Real Time PCR expression analysis.**

| <b>Genes</b> | <b>Forward primers (5'- 3')</b> | <b>Reverse primers (5'- 3')</b> |
|--------------|---------------------------------|---------------------------------|
| EN1          | TGGGTGTA CTGCACACGTTATTC        | CTTGTCCTCCTTCTCGTTCTTCTT        |
| SCTR         | CTCTGAAAGAAAGTACCTCCAGGG        | GCAACAAAAATGGCTGGAGAA           |
| INHBB        | CGCGTTTCCGAAATCATCA             | GGACCACAAACAGGTTCTGGTT          |
| PTPN4        | GATCTCCACCGGGA ACTCCT           | AACCGGGTTCCTTCCTGC              |
| RALB         | GAACATGAATCCTTTACAGCAACTG       | CGACGAGCAGTGGAATTTTATCT         |
| GLI2         | CACCAGAATCGCACCCACT             | GCCTGGGATCTTGCAGATGT            |
| MARCO        | GCTGCAGCGGGTAGACA ACT           | GCCTTGTTACCTTTGATTCTGA          |
| TSN          | AGACCAAATTCCTGCTGAACAG          | AAGCGCTGCAACACAAACCT            |

**Supplemental Table 4. Methylation of CpG island promoters in human colorectal cancer.**

|                                           | <b>EN1 M/U<sup>a</sup></b> | <b>SCTR M/U<sup>a</sup></b> | <b>INHBB M/U<sup>a</sup></b> | <b>No of Methylated genes<br/>0 / 1 / 2 / 3</b> |
|-------------------------------------------|----------------------------|-----------------------------|------------------------------|-------------------------------------------------|
| <b>Normal tissue</b>                      | 1/89 <b>(1)</b>            | 2 / 88 <b>(2)</b>           | 0 / 91 <b>(0)</b>            | 87 / 3 / 0 / 0 <b>(96 / 3 / 0 / 0)</b>          |
| <b>Adenomas</b>                           | 4 / 6 <b>(40)</b>          | 3 / 6 <b>(33)</b>           | 0 / 10 <b>(0)</b>            | 3 / 7 / 0 / 0 <b>(30 / 70 / 0 / 0)</b>          |
| <b>Carcinomas</b>                         | 66 /24 <b>(73)</b>         | 48/42 <b>(53)</b>           | 23 / 68 <b>(25)</b>          | 9 / 36 / 37 / 9 <b>(10 / 40 / 40 / 10)</b>      |
| <b>X<sup>2</sup> / Fisher<sup>b</sup></b> | p= 0.062                   | p=0.309                     | p=0.011                      | <b>p= 0.018</b>                                 |

<sup>a</sup> M/U: Methylated/Unmethylated (number in parentheses indicate percentage of cases exhibiting methylation)

<sup>b</sup> Comparison of Adenomas vs. Carcinomas using Fisher's or Pearson's Chi-square Test as appropriate.

**Supplemental Table 5. Analysis of DNA methylation in EN1 in different samples from colorectal cancer patients using different techniques.**

| Gene             | EN1  |      |    |      |      |      |      |      |      | Tumor clinicopathological features |              |     |              |         |
|------------------|------|------|----|------|------|------|------|------|------|------------------------------------|--------------|-----|--------------|---------|
|                  | BS   |      |    | MC   |      |      | MSP  |      |      | Sex                                | Dukes' stage | Age | Localization |         |
| Technique        | T    | ST   | SE | T    | ST   | SE   | T    | ST   | SE   |                                    |              |     |              |         |
| ID               | 1    | +    | -  | -    | +    | +    | +    | +    | -    | -                                  | M            | C   | 71           | Sigmoid |
|                  | 2    | +    | -  | -    | +    | -    | -    | +    | -    | +                                  | F            | D   | 67           | Sigmoid |
|                  | 3    | +    | +  | -    | +    | +    | -    | +    | +    | -                                  | F            | A   | 74           | Rectum  |
|                  | 4    | +    | -  | -    | +    | +    | +    | +    | -    | -                                  | M            | B   | 71           | Rectum  |
|                  | 5    | +    | -  | -    | +    | +    | -    | +    | -    | -                                  | M            | B   | 65           | Rectum  |
|                  | 6    | +    | -  | -    | +    | -    | -    | +    | -    | -                                  | M            | C   | 87           | Sigmoid |
|                  | 7    | +    | -  | -    | +    | -    | -    | +    | -    | -                                  | M            | B   | 73           | Sigmoid |
|                  | 8    | +    | +  | -    | +    | +    | -    | +    | -    | -                                  | M            | C   | 55           | Cecum   |
|                  | 9    | +    | -  | -    | +    | +    | -    | +    | -    | +                                  | F            | C   | 73           | Cecum   |
|                  | 10   | +    | -  | -    | +    | -    | -    | +    | -    | -                                  | M            | ADE | 83           | Rectum  |
|                  | 11   | +    | -  | -    | +    | -    | -    | +    | -    | +                                  | M            | C   | 73           | Left    |
|                  | 12   | +    | +  | -    | +    | +    | -    | +    | +    | -                                  | M            | A   | 77           | Rectum  |
|                  | 13   | +    | -  | NA   | +    | -    | NA   | +    | -    | NA                                 | M            | A   | 80           | Sigmoid |
|                  | 14   | +    | -  | NA   | +    | -    | NA   | +    | -    | NA                                 | F            | ADE | 71           | Sigmoid |
|                  | 15   | +    | -  | NA   | +    | -    | NA   | +    | -    | NA                                 | M            | D   | 64           | Rectum  |
|                  | 16   | +    | -  | -    | -    | -    | -    | +    | -    | -                                  | M            | A   | 73           | Cecum   |
|                  | 17   | +    | -  | NA   | -    | -    | NA   | +    | -    | NA                                 | M            | A   | 55           | Left    |
|                  | 18   | -    | -  | -    | +    | -    | -    | +    | +    | -                                  | M            | B   | 65           | Rectum  |
|                  | 19   | -    | -  | -    | +    | -    | -    | +    | -    | -                                  | M            | A   | 67           | Rectum  |
|                  | 20   | -    | -  | -    | -    | -    | -    | +    | -    | -                                  | F            | C   | 88           | Rectum  |
|                  | 21   | -    | -  | -    | -    | -    | -    | +    | +    | -                                  | F            | D   | 71           | Rectum  |
|                  | 22   | -    | +  | -    | +    | +    | -    | +    | -    | -                                  | M            | C   | 73           | Rectum  |
|                  | 23   | -    | -  | -    | -    | -    | -    | +    | -    | -                                  | F            | B   | 49           | Splenic |
|                  | 24   | -    | -  | NA   | -    | -    | NA   | +    | -    | NA                                 | F            | A   | 84           | Left    |
|                  | 25   | -    | -  | NA   | -    | -    | NA   | +    | -    | NA                                 | F            | C   | 73           | Rectum  |
|                  | 26   | -    | -  | NA   | -    | -    | NA   | +    | -    | NA                                 | M            | D   | 88           | Sigmoid |
|                  | 27   | -    | -  | NA   | -    | -    | NA   | +    | -    | NA                                 | F            | B   | 84           | Rectum  |
|                  | 28   | -    | -  | -    | -    | -    | +    | -    | -    | +                                  | F            | D   | 76           | Cecum   |
|                  | 29   | -    | -  | -    | -    | -    | -    | -    | -    | -                                  | F            | ADE | 69           | Sigmoid |
|                  | 30   | -    | -  | -    | -    | -    | -    | -    | -    | -                                  | F            | C   | 65           | Left    |
| <b>Methyl.</b>   | 17   | 4(3) | 0  | 18   | 8(8) | 3(2) | 27   | 4(4) | 4(3) |                                    |              |     |              |         |
| <b>Unmethyl.</b> | 13   | 26   | 21 | 13   | 23   | 19   | 3    | 26   | 18   |                                    |              |     |              |         |
| <b>Methyl %</b>  | 56.7 | 13.3 | 0  | 60.0 | 26.7 | 13.6 | 90.0 | 13.3 | 18.2 |                                    |              |     |              |         |
| <b>True+ %</b>   |      | 17.7 | 0  |      | 44.4 | 16.7 |      | 14.8 | 14.8 |                                    |              |     |              |         |

T: tumor, ST: stool DNA, SE: serum DNA, BS: bisulfite sequencing, MC: melting curve analysis, MSP: methylation specific PCR. +: methylated, -: unmethylated. M: male, F: female. True positive (+) are methylated stool or serum DNA samples matching a methylated tumor sample as determined using the same technique.

**Supplemental Table 6. Analysis of DNA methylation in EN1 in different samples from healthy controls using different techniques.**

| Gene                      |    | EN1  |     |     |    |     |      | Sample information |     |
|---------------------------|----|------|-----|-----|----|-----|------|--------------------|-----|
| Technique                 |    | BS   | BS  | MC  | MC | MSP | MSP  |                    |     |
| Sample                    | ID | ST   | SE  | ST  | SE | ST  | SE   | Sex                | Age |
|                           | 1  | +    | -   | -   | -  | -   | +    | M                  | 53  |
|                           | 2  | -    | -   | -   | -  | NA  | +    | F                  | 64  |
|                           | 3  | -    | -   | -   | -  | -   | +    | M                  | 55  |
|                           | 4  | -    | -   | -   | -  | -   | +    | F                  | 56  |
|                           | 5  | -    | -   | -   | -  | -   | +    | F                  | 57  |
|                           | 6  | -    | +   | -   | -  | -   | +    | M                  | 68  |
|                           | 7  | -    | -   | -   | -  | -   | -    | M                  | 63  |
|                           | 8  | -    | -   | -   | -  | -   | -    | F                  | 50  |
|                           | 9  | -    | -   | -   | -  | -   | -    | F                  | 51  |
|                           | 10 | -    | -   | -   | -  | -   | -    | F                  | 58  |
|                           | 11 | -    | -   | -   | -  | -   | -    | F                  | 58  |
|                           | 12 | -    | -   | -   | -  | -   | -    | M                  | 52  |
|                           | 13 | -    | NA  | -   | NA | -   | NA   | M                  | 69  |
|                           | 14 | -    | NA  | -   | NA | -   | NA   | M                  | 56  |
|                           | 15 | -    | NA  | -   | NA | +   | NA   | F                  | 66  |
|                           | 16 | -    | NA  | -   | NA | +   | NA   | M                  | 60  |
|                           | 17 | -    | NA  | -   | NA | -   | NA   | F                  | 49  |
|                           | 18 | -    | NA  | -   | NA | -   | NA   | F                  | 35  |
|                           | 19 | -    | NA  | -   | NA | -   | NA   | M                  | 60  |
|                           | 20 | -    | NA  | -   | NA | -   | NA   | F                  | 75  |
|                           | 21 | -    | NA  | -   | NA | -   | NA   | F                  | 62  |
|                           | 22 | -    | NA  | -   | NA | -   | NA   | M                  | 65  |
|                           | 23 | -    | NA  | -   | NA | -   | NA   | F                  | 74  |
|                           | 24 | -    | NA  | -   | NA | -   | NA   | F                  | 67  |
|                           | 25 | -    | NA  | -   | NA | -   | NA   | M                  | 59  |
|                           | 26 | -    | NA  | -   | NA | -   | NA   | F                  | 81  |
|                           | 27 | -    | NA  | -   | NA | -   | NA   | M                  | 68  |
|                           | 28 | -    | NA  | -   | NA | -   | NA   | M                  | 69  |
|                           | 29 | (-)* | NA  | +   | NA | NA  | NA   | F                  | 65  |
|                           | 30 | -    | NA  | -   | NA | -   | NA   | M                  | 36  |
| <b>Methylated</b>         |    | 1    | 1   | 1   | 0  | 2   | 6    |                    |     |
| <b>Unmethylated</b>       |    | 29   | 11  | 29  | 12 | 27  | 6    |                    |     |
| <b>False positive (%)</b> |    | 3.3  | 8.3 | 3.3 | 0  | 6.6 | 50.0 |                    |     |

ST: stool DNA, SE: serum DNA, BS: bisulfite sequencing, MC: melting curve analysis, MSP: methylation specific PCR. +: methylated, -: unmethylated. M: male, F: female.

\* Bisulfite sequencing of a fragment including 21 CpG sites revealed full methylation in 3 CpGs with full unmethylation in the rest, therefore it was considered as unmethylated.
